# Supplementary material for: Tin sulfide nanoribbons as high performance photoelectrochemical cells, flexible photodetectors and visible-light-driven photocatalysts
Source: Royal Society of Chemistry journal article supplement (doi:10.1039/c2ra22092j), 2012-12-18

## Electronic Supplementary Information (ESI)

### Tin sulfide nanoribbons as high performance photoelectrochemical cells, flexible photodetectors and visible-light-driven photocatalysts

Junfeng Chao, Zhuoran Wang, Xin Xu, Qingyi Xiang, Weifeng Song, Gui Chen, Jiebo Hu, Di Chen\*

Wuhan National Laboratory for Optoelectronics (WNLO) and College of Optoelectronic Science and Engineering, Huazhong University of Science and Technology (HUST), Wuhan, 430074, China.

\*E-mail: gzshen@mail.hust.edu.cn. dichen@mail.hust.edu.cn Fax: 86-27-87792225.

**Fig S1.** UV-vis absorption spectrum for the as-synthesized SnS nanoribbons

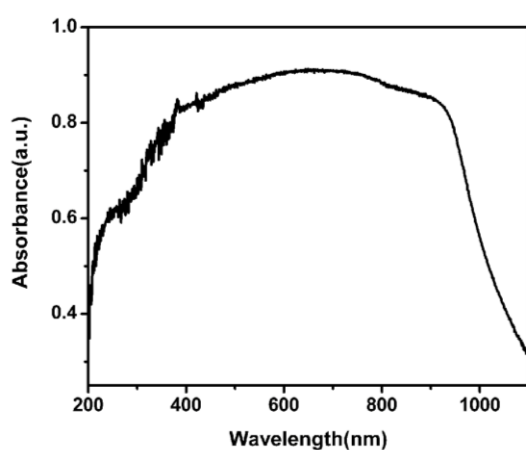

Supplement: c2ra22092j.pdf [file c2ra22092j.pdf]
